# Supplementary material for: Historical earthquake records in the Weihe Basin, central China and new insights for geothermal genesis
Source: Frontiers journal article supplement (doi:10.3389/feart.2024.1287450), 2024-02-14
Supplement: Table_1.XLSX [file Table_1.XLSX]

## Sheet: Historical earthquakes
Year	Month	Day	Longitude(°E)	Lattitude(°N)	Magnitude
-780	-	-	107.8	34.5	6.5
-280	-	-	108.8	34.4	5
-35	7	11	109	34.4	5
600	12	13	108.9	34.3	5.5
793	5	27	109.7	34.5	6
835	4	11	108.9	34.3	4
836	2	25	108.9	34.3	4
879	3	-	109.3	34.2	4
880	2	-	107.8	34.5	4
1307	-	-	107.8	34.5	5
1487	8	10	108.9	34.4	6
1556	1	23	109.7	34.5	8
1558	11	21	109.7	34.5	5.5
1568	1	-	109.3	34.2	5
1568	4	-	109.2	34.4	5.5
1568	4	12	107	33.1	5
1568	5	15	109	34.4	6
1624	10	-	107.5	33.2	5.5
1631	-	-	106	33.7	5
1631	7	-	107.8	35.5	5
1634	12	-	107.7	35.1	5.5
1635	10	26	107.5	33.2	5.5
1636	-	-	107	33.1	5.5
1704	9	28	106.8	34.9	6
1957	1	30	109.8	33.9	4
1959	9	28	109.3	33	5
1960	4	22	106.4	34.5	4.5
1965	9	14	106.9	35.1	4

## Sheet: Earthquakes from USGS
Time	Lattitude(°N)	Longitude(°E)	depth(km)	Magnitude
2009-11-04 23:31:31	34.532	109.242	10	4.8
1998-01-05 01:36:44	34.445	109.065	21.8	4.3
1988-01-06 05:47:19	34.254	108.279	10	4.7

## Sheet: Earthquakes from NADS(2009-now)
Time	Longitude(°E)	Lattitude(°N)	depth(km)	Magnitude
UTC/GMT+08:00
2022-06-11 14:24:42	109.5	34.79	28	1.1
2022-05-12 12:26:42	107.04	34.71	24	2.1
2022-05-11 12:53:58	106.92	34.77	22	1.4
2022-04-09 09:32:32	109.88	33.61	12	1.4
2022-04-09 09:31:59	109.89	33.61	14	1.8
2021-12-08 21:22:57	106.89	34.78	21	1.9
2021-10-21 01:50:09	108.2	33.76	14	1.1
2021-07-23 09:28:58	107.19	33.99	14	1.9
2021-04-30 02:35:40	109.22	34.62	18	1.3
2021-04-14 00:19:15	108.13	33.71	8	1.5
2021-04-13 23:35:34	108.14	33.71	13	2.1
2021-04-09 15:20:32	109.19	34.52	17	2
2021-04-05 08:53:29	108.14	33.72	8	1.5
2021-03-24 02:04:20	108.13	33.71	13	2
2021-03-10 19:02:48	108.13	33.71	12	1.8
2021-03-10 18:00:33	108.14	33.71	12	1.5
2021-03-06 19:39:11	109.22	34.61	15	1.2
2021-03-04 14:05:44	108.13	33.71	11	1.2
2021-02-20 09:41:56	108.44	33.88	18	2.7
2021-02-10 09:05:10	108.14	33.71	7	2.3
2021-02-03 22:44:34	109.98	34.82	27	1.5
2021-02-03 07:18:28	108.13	33.72	11	1.1
2021-01-20 23:52:47	108.13	33.71	8	1.3
2021-01-20 23:47:13	108.13	33.71	5	1.5
2021-01-07 00:53:02	109.99	34.6	15	1.1
2021-01-04 11:13:11	109.22	34.62	16	1.1
2020-10-26 17:20:24	106.88	34.96	11	1.3
2020-09-14 12:01:16	108.14	33.71	11	1.1
2020-09-04 05:48:17	108.13	33.71	13	2
2020-09-04 03:26:36	108.14	33.71	10	1.2
2020-09-04 02:53:19	108.13	33.71	7	1.5
2020-08-24 18:38:17	108.15	33.71	10	1.4
2020-08-14 02:37:35	108.13	33.72	3	1.3
2020-08-13 22:32:10	108.12	33.7	10	1.2
2020-07-23 21:37:40	108.14	33.71	9	1.4
2020-07-23 14:39:12	108.14	33.71	9	1.3
2020-07-23 14:23:12	108.14	33.71	12	2.5
2020-07-14 05:36:35	108.14	33.72	13	1.2
2020-06-26 15:47:00	108.14	33.71	14	1.9
2020-06-26 02:23:34	108.15	33.71	10	1.2
2020-06-18 09:22:38	107.46	34.53	28	2.1
2020-06-16 03:38:20	108.14	33.71	12	1.6
2020-06-11 00:30:27	108.13	33.7	12	1.8
2020-05-23 14:24:57	108.13	33.72	12	1.2
2020-05-18 11:38:34	108.13	33.71	11	2.5
2020-05-16 20:08:54	108.14	33.71	6	1.7
2020-05-16 19:25:19	108.15	33.71	4	1.7
2020-05-03 04:33:56	108.14	33.71	7	1.8
2020-04-21 08:47:59	108.14	33.71	13	1.7
2020-04-20 23:03:02	108.13	33.71	11	1.3
2020-04-19 08:34:37	108.15	33.7	10	1.6
2020-04-14 11:34:11	108.13	33.71	10	1.4
2020-02-29 12:32:52	109.12	34.78	24	1.3
2020-01-18 19:35:58	106.76	34.89	17	1.1
2019-12-18 16:10:02	108.63	33.72	16	1.2
2019-11-14 17:06:57	106.85	34.92	15	1.1
2019-08-27 12:05:51	109.22	34.62	15	1.2
2019-05-27 20:31:08	109.22	34.62	15	1.1
2019-05-06 15:17:47	109.12	34.85	10	1.1
2019-04-20 08:50:22	109.13	34.8	15	1.4
2019-04-20 04:15:10	109.13	34.79	16	2.1
2019-04-06 19:43:53	107.69	33.76	23	1.4
2019-01-27 18:18:57	109.6	34.72	29	2.6
2018-11-16 12:03:32	107.26	34.1	12	1.2
2018-11-06 13:13:03	109.44	34.65	14	1.1
2018-10-24 11:44:18	108.3	34.75	8	1.2
2018-06-13 14:18:39	109.2	34.68	15	3.1
2018-05-28 03:52:30	109.02	34.7	14	1.1
2018-05-20 01:59:59	109.12	34.52	15	1.2
2017-11-19 15:11:22	108.24	34.62	25	2.2
2017-09-05 16:17:34	107.01	34.3	17	1.3
2016-12-29 22:04:25	109.83	33.56	18	1.5
2016-11-18 00:04:04	108.14	33.62	4	1.1
2016-11-03 19:25:08	109.16	34.72	29	1.1
2016-10-03 10:58:41	108.39	33.73	12	1
2016-09-30 02:13:03	108.11	34.1	16	1.5
2016-09-14 13:12:19	109.25	34.52	17	3.1
2016-04-04 18:12:46	109.65	34.55	13	1.1
2016-01-14 21:27:02	108.24	34.14	6	1.3
2016-01-05 18:56:51	107.5	34.5	12	1.3
2015-12-13 07:55:49	108.94	34.5	14	2.5
2015-12-04 20:48:59	109	34.41	8	1.4
2015-07-11 04:30:12	108.16	33.74	5	1.2
2015-07-08 01:33:54	106.9	34.76	6	1.9
2015-06-20 00:27:33	109.17	34.57	8	1.7
2015-05-15 13:24:45	107.36	34.52	6	1.6
2015-03-27 18:20:26	109.12	34.55	8	1.9
2015-02-11 20:32:58	108.77	34.12	8	2
2014-12-23 03:38:29	106.8	33.76	5	1.4
2014-10-10 00:45:39	108.43	33.81	8	1.2
2014-08-20 20:21:04	109.14	34.45	8	1.8
2014-07-17 17:55:31	108.27	34.74	6	1.3
2014-07-07 11:44:27	109.24	34.46	5	1.4
2014-07-01 00:01:43	107.87	34.34	6	1.3
2014-06-29 03:19:26	109.08	33.57	6	1.1
2014-05-12 20:19:15	107.1	34.65	5	1.8
2014-05-12 05:09:19	107.2	33.95	7	1.6
2014-02-16 10:21:18	109.01	34.64	8	2.2
2014-01-14 10:39:08	109.13	34.44	6	1.4
2014-01-14 05:59:37	109.15	34.45	8	1.3
2013-11-30 06:50:26	106.8	34.83	6	1
2013-09-11 01:46:48	109.96	34.71	9	1.9
2013-06-22 19:59:35	109.11	34.83	9	1
2013-04-06 17:39:38	108.5	34.1	6	1
2013-03-17 06:29:07	108.5	34.11	9	1.7
2013-03-16 22:21:40	108.51	34.11	5	2.3
2013-02-25 10:23:50	108.51	34.16	8	2.3
2012-06-21 02:25:23	107.89	34.35	6	1.8
2012-06-08 19:51:24	109	33.52	6	1.4
2012-05-11 04:55:54	107.99	34.2	6	1.1
2012-05-08 08:19:04	107.68	34.06	6	1.2
2012-01-19 23:03:44	108.23	33.93	7	1
2012-01-03 14:47:14	108.16	34.3	5	1.2
2012-01-01 06:34:12	109.05	34.48	6	1
2011-12-07 14:07:03	108.16	34.28	6	1.4
2011-12-06 15:34:06	107.1	35	6	1.1
2011-10-29 20:10:02	107.89	33.58	6	1
2011-07-21 21:37:34	107.84	34.36	9	1.3
2011-05-28 07:06:19	109.58	34.73	4	1.1
2011-04-21 21:53:37	109.17	34.47	6	1.3
2011-04-14 13:54:14	107.01	34.75	8	2
2011-02-26 15:29:57	106.91	33.78	6	1.2
2010-11-12 21:02:17	107.02	34.03	5	1.1
2010-09-22 19:16:05	109.19	34.63	5	1.5
2010-09-18 21:54:28	108.29	34.34	5	1.1
2010-08-30 01:24:43	109.14	34.46	8	1
2010-08-20 16:34:01	108.78	33.7	7	1.6
2010-08-10 05:46:24	108.14	34.1	6	2.9
2010-08-10 05:44:24	108.13	34.11	13	1.3
2010-07-12 03:14:32	107.08	34.01	9	1.9
2010-06-30 12:24:54	109.14	34.48	8	2.1
2010-06-24 09:10:55	108.99	34.73	6	3.2
2010-05-18 10:12:16	109.14	34.48	8	1.4
2010-05-18 08:35:20	109.14	34.47	8	1.3
2010-04-07 22:00:45	109.22	34.62	6	2
2010-04-03 21:50:56	109.15	34.47	6	1.3
2010-03-25 06:19:24	109.19	34.4	8	2.1
2010-03-19 03:29:32	109.15	34.46	5	1.2
2010-02-09 20:01:19	109.15	34.47	8	1.3
2010-02-06 19:55:25	109.99	34.64	6	1.6
2010-01-23 14:40:01	107.8	34.57	6	1.1
2009-12-25 11:16:43	109.07	34.73	6	1.1
2009-12-14 16:24:58	108.46	34.18	5	1.7
2009-12-12 06:40:28	108.45	34.17	6	1.1
2009-12-12 00:09:16	109.15	34.48	9	1.5
2009-12-09 15:01:14	109.16	34.49	6	1.2
2009-11-20 18:08:07	109.14	34.48	7	3
2009-11-14 15:25:06	109.14	34.47	7	1.3
2009-11-14 15:08:53	109.13	34.49	6	1
2009-11-12 05:50:25	109.16	34.47	5	1.7
2009-11-12 00:15:43	109.15	34.47	6	1.5
2009-11-11 05:25:03	109.14	34.48	6	1.9
2009-11-10 21:25:27	109.14	34.47	6	1.1
2009-11-10 21:16:11	109.14	34.46	8	1.2
2009-11-08 18:43:50	109.15	34.48	8	1.5
2009-11-08 00:51:02	109.16	34.47	7	1.4
2009-11-07 01:36:00	109.15	34.48	5	1.1
2009-11-05 19:36:54	109.14	34.47	6	1.8
2009-11-05 16:53:52	109.16	34.48	4	1.3
2009-11-05 16:53:37	109.13	34.46	6	1.1
2009-11-05 10:35:29	109.14	34.47	6	2.7
2009-11-05 09:01:03	109.13	34.47	6	1.4
2009-11-05 08:58:11	109.13	34.49	7	2
2009-11-05 08:29:08	109.12	34.5	8	1
2009-11-05 07:45:12	109.16	34.48	6	1.4
2009-11-05 07:41:38	109.14	34.48	8	1.6
2009-11-05 07:31:32	109.14	34.48	5	4.2
2009-10-30 07:06:44	109.13	34.47	6	2
2009-10-17 23:31:29	107.07	34.03	7	1.4
2009-09-13 09:07:12	107.08	33.65	6	1.3
2009-09-07 14:47:20	109.06	34.48	6	1.2
2009-08-31 08:53:03	106.82	34.86	4	1
2009-08-21 03:41:03	108.44	33.65	7	1.3
2009-08-12 12:41:40	109.47	34.8	8	1.1
2009-07-14 08:02:09	107.12	34.96	12	1.5
2009-07-07 13:16:07	107.21	34.9	7	1.4
2009-06-27 04:49:14	109.27	34.52	9	1.7
2009-06-05 14:17:23	107.46	34.35	7	1.1
2009-04-19 11:12:16	109.18	34.5	8	1.6
2009-03-05 01:01:03	109.05	34.76	6	1.2
2009-03-04 23:34:21	106.92	33.63	6	1.2
